# Supplementary material for: AgNPs: An Adaptive Methodology in Malignant Growth Treatment, Disclosing Upgraded Radiotherapy and Beyond
Source: Preprints.org preprint supplement (doi:10.20944/preprints202408.1965.v1), 2024-08-27
Supplement: Supplementary file 1 [file supplementary]

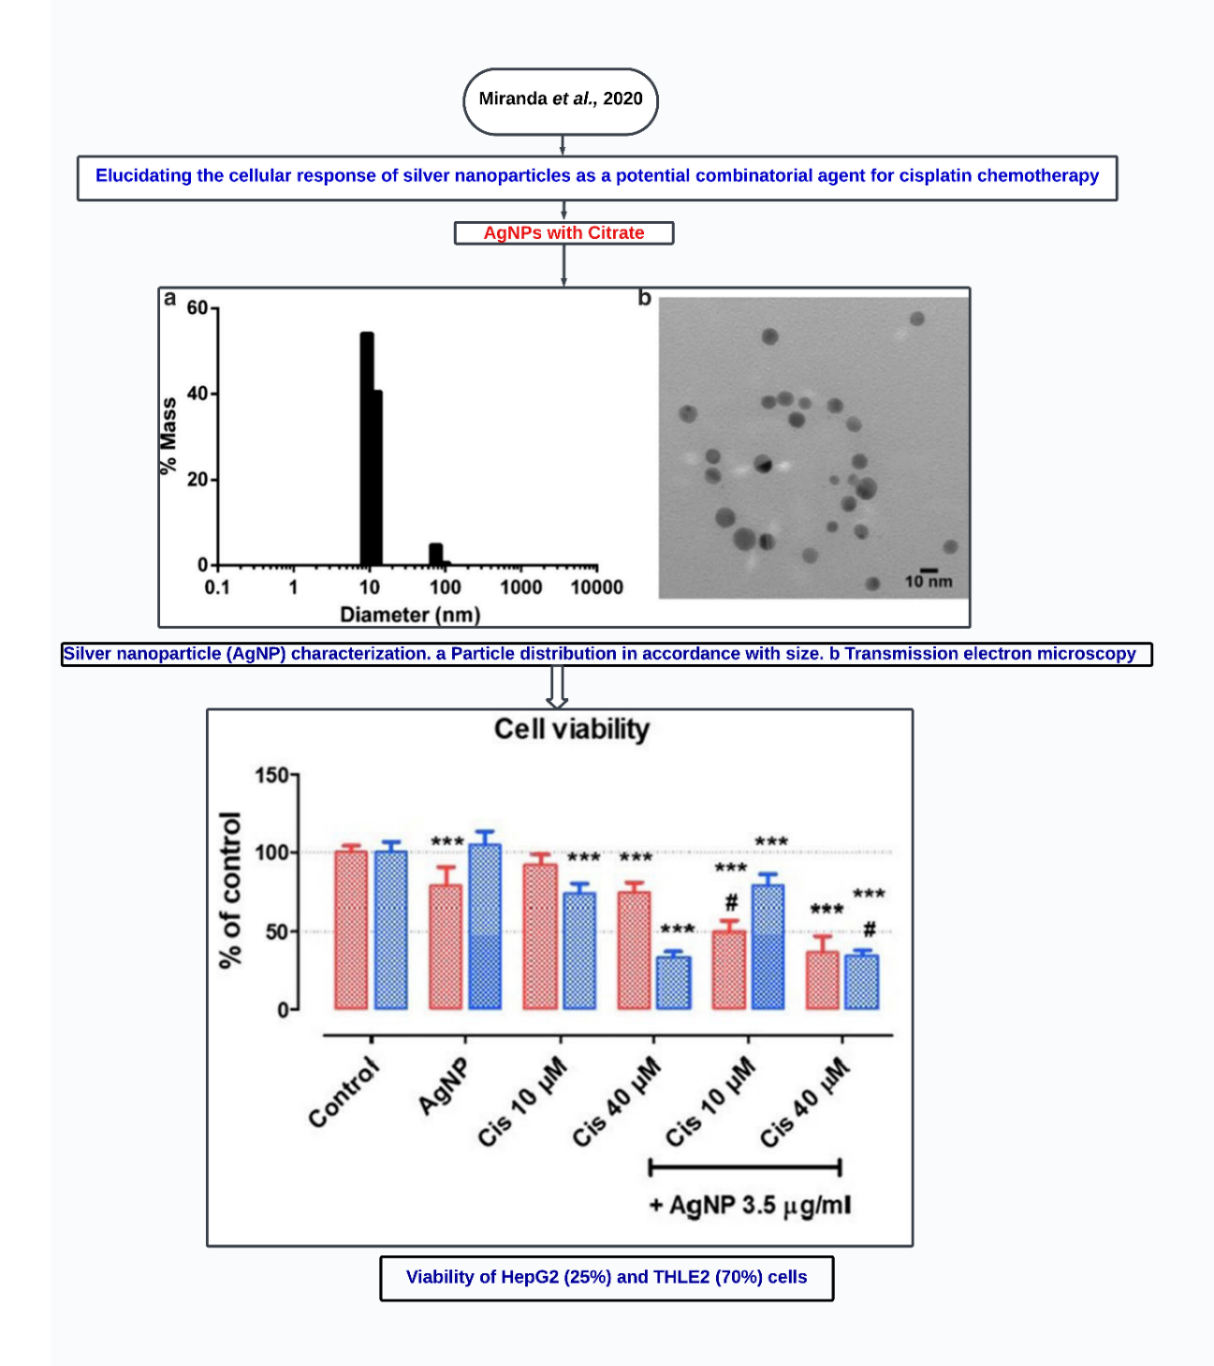


**a**


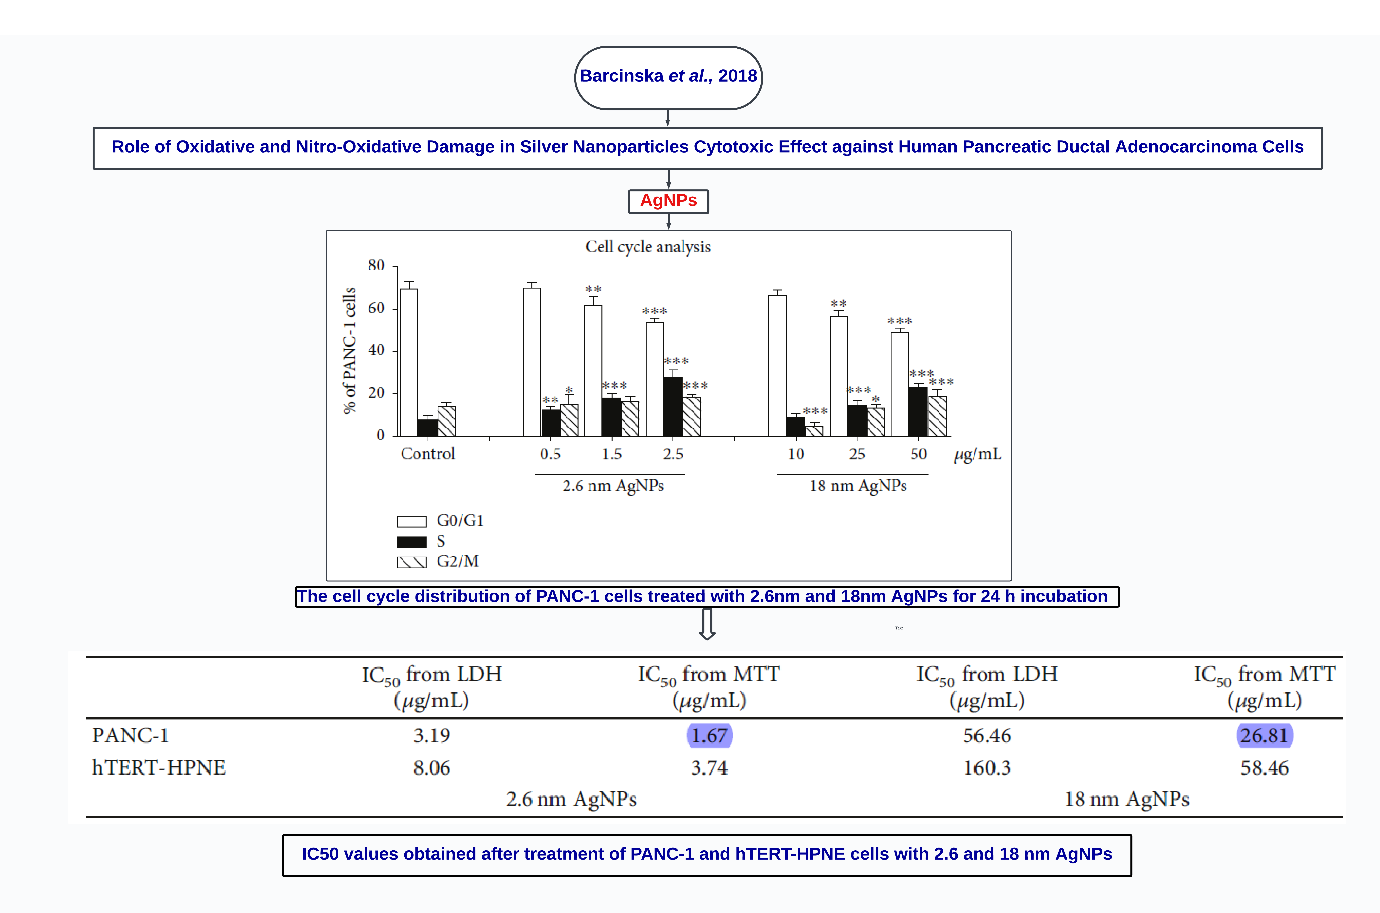


**b**

**Figure S1.** Articles summary for a. Miranda *et al.*, 2020 [10] and b. Barcinska *et al.,* 2018 [11]


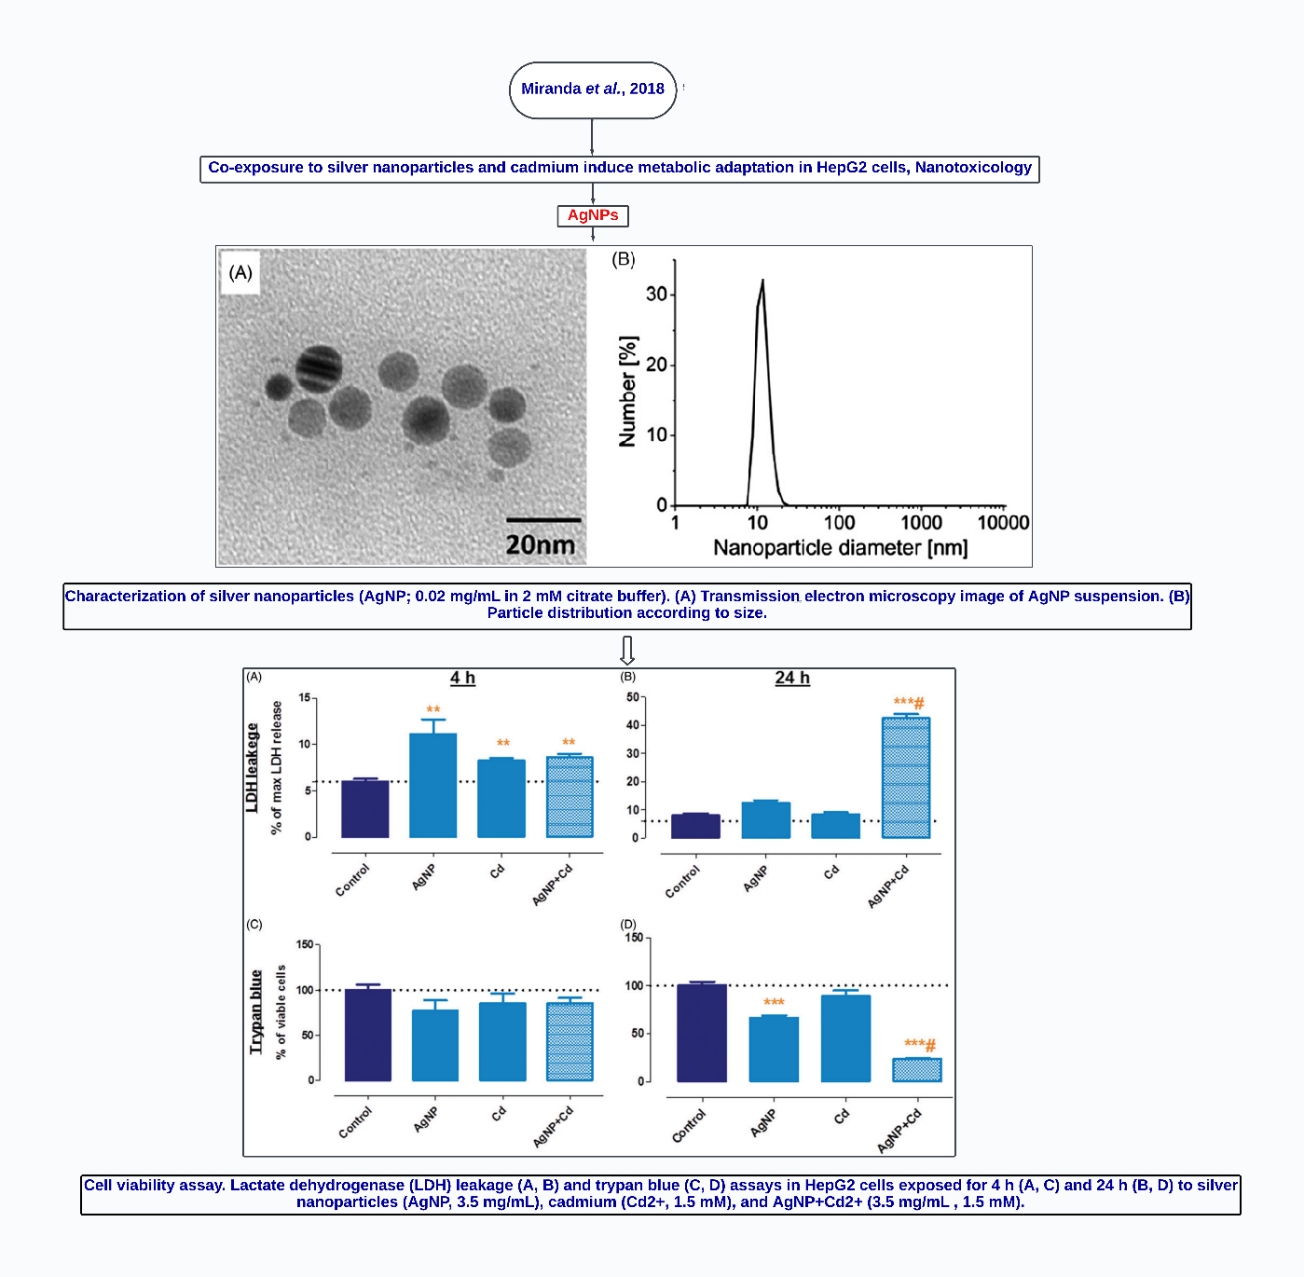


**a**


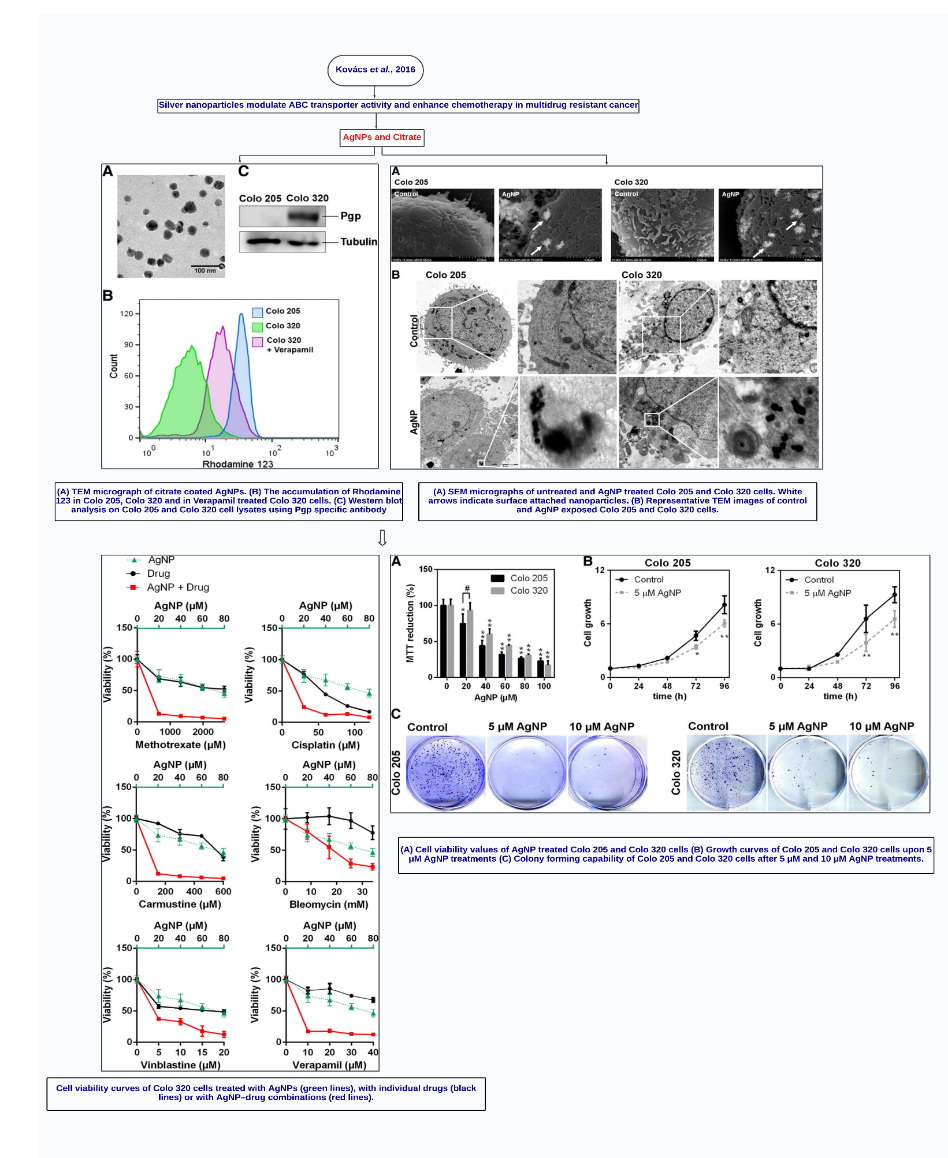


**b**

**Figure S2.** articles summary for a. Miranda *et al.,* 2018 [12] and b. Kovács *et al.* 2016 [13]


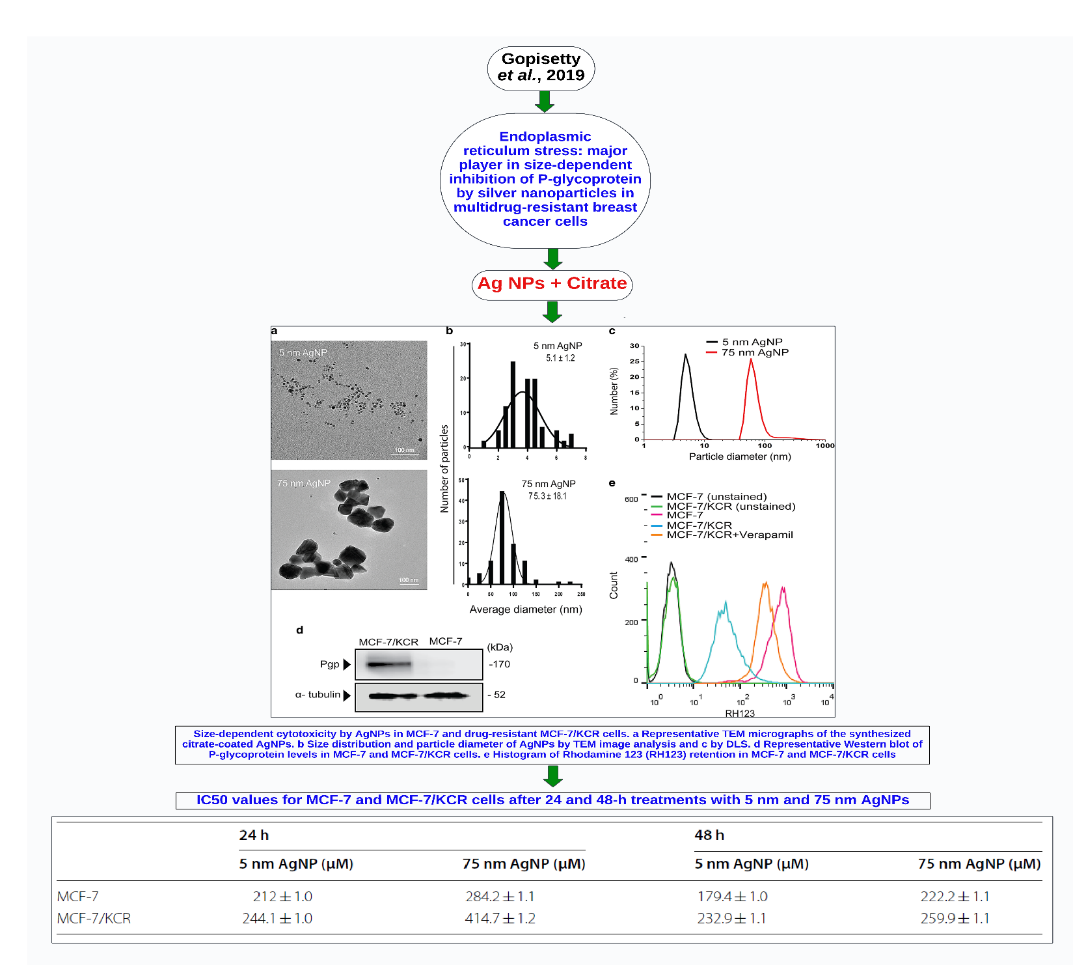


**a**


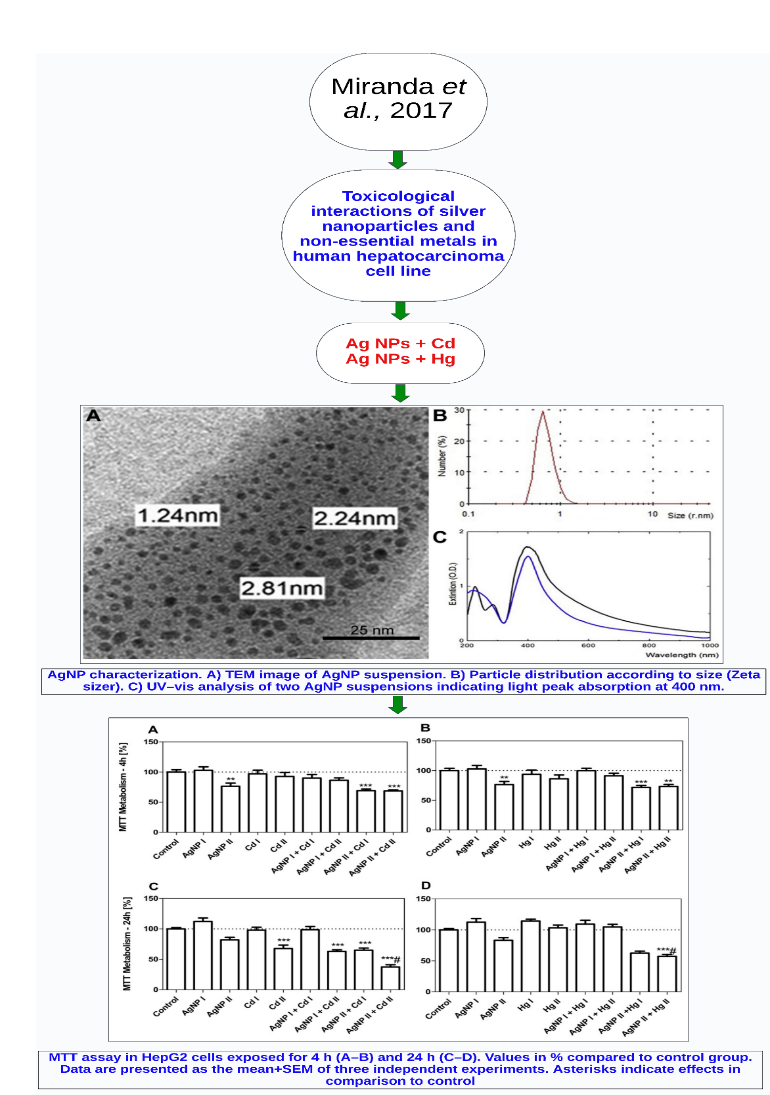


**b**

**Figure S3.** articles summary for a. Gopisetty *et al.,* 2019 [14] and b. Miranda *et al.*, 2017 [15]


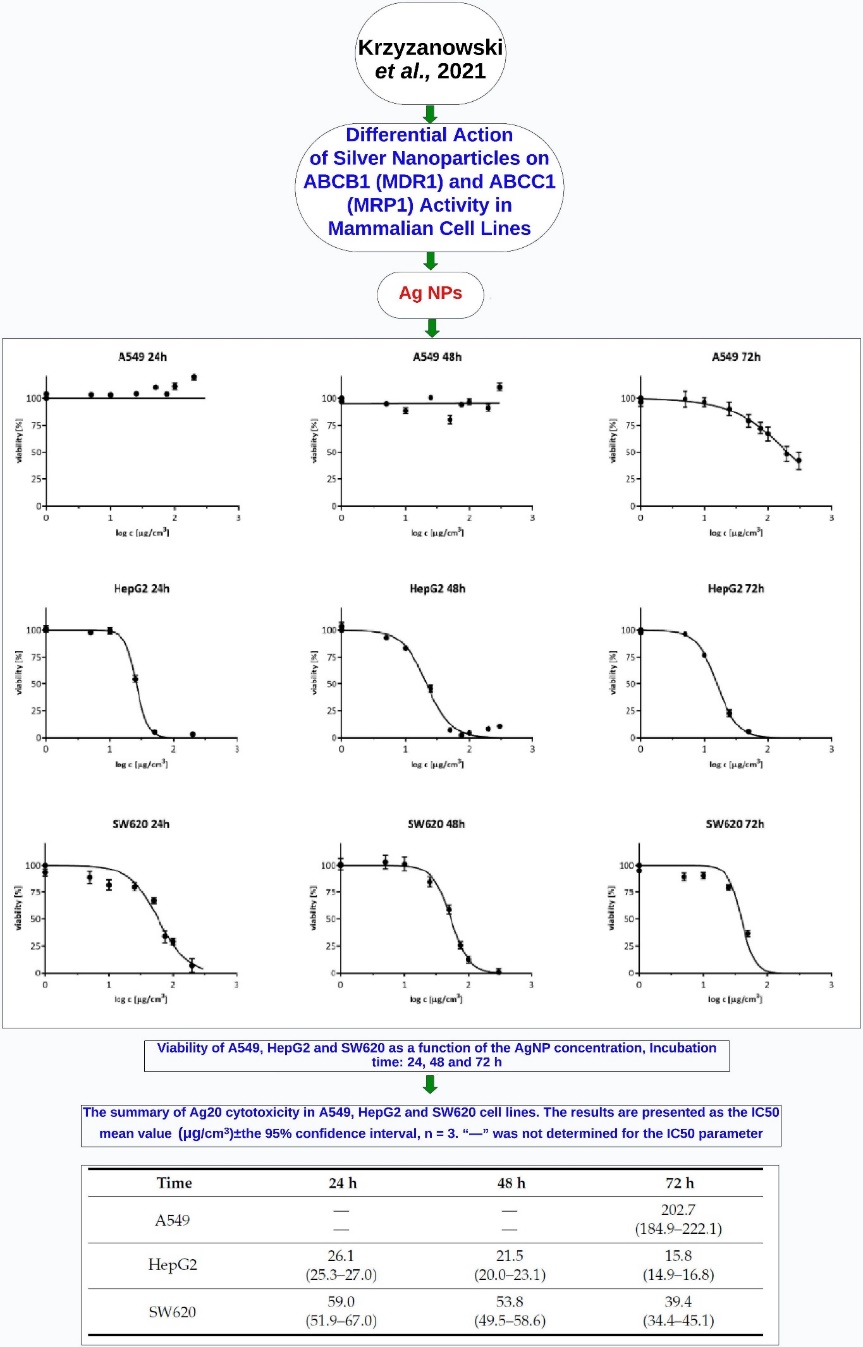


**a**


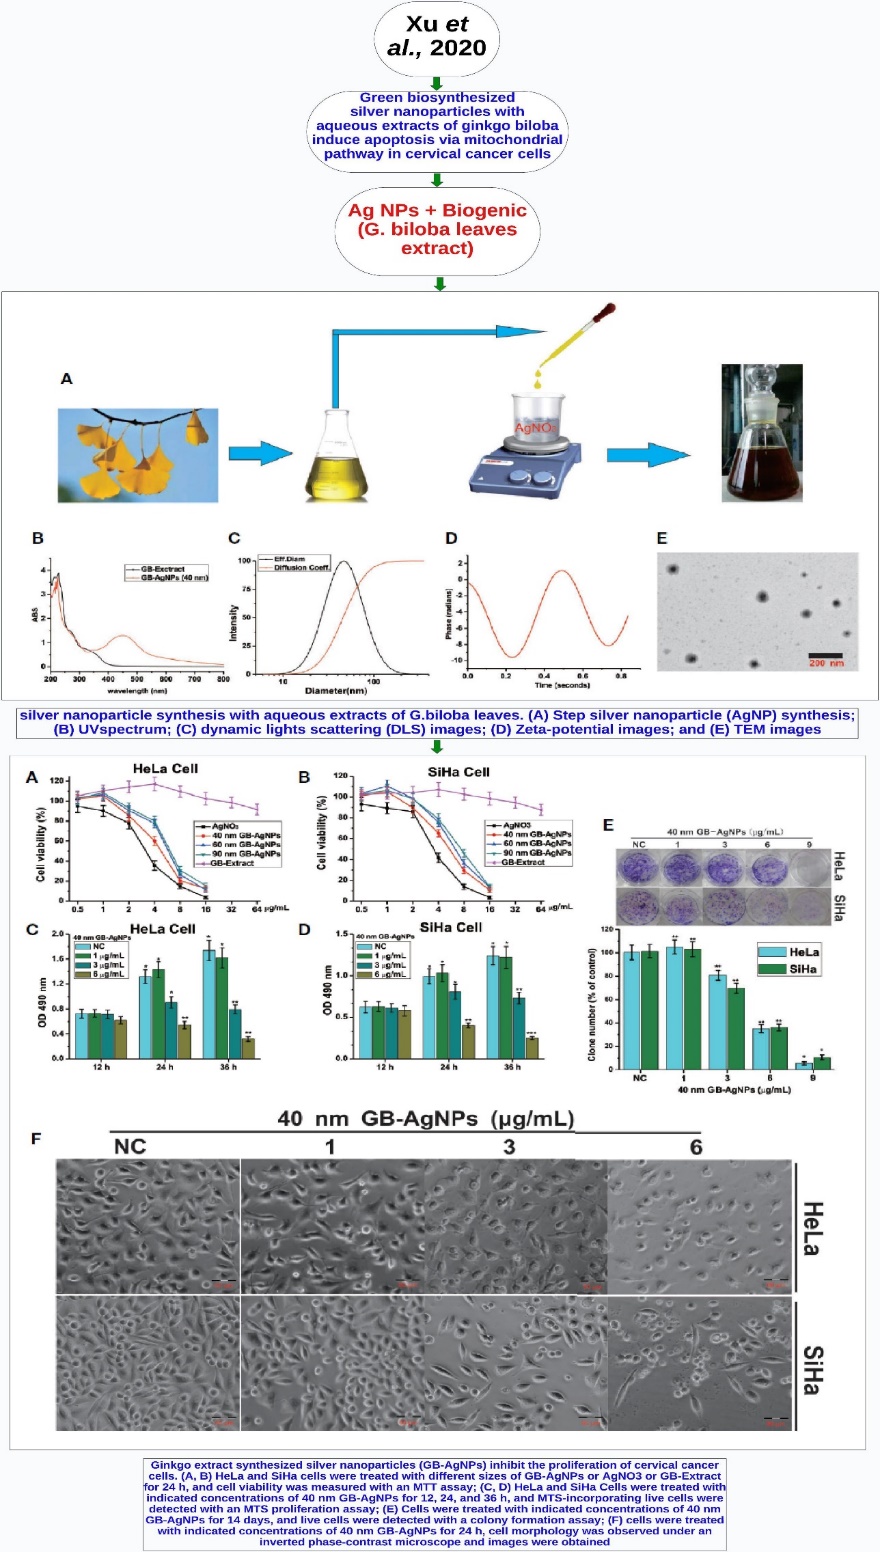


**b**

**Figure S4.** Articles summary for a. Krzyzanowski *et al.* 2021 [16] and b. Xu *et al.,* 2020 [17]


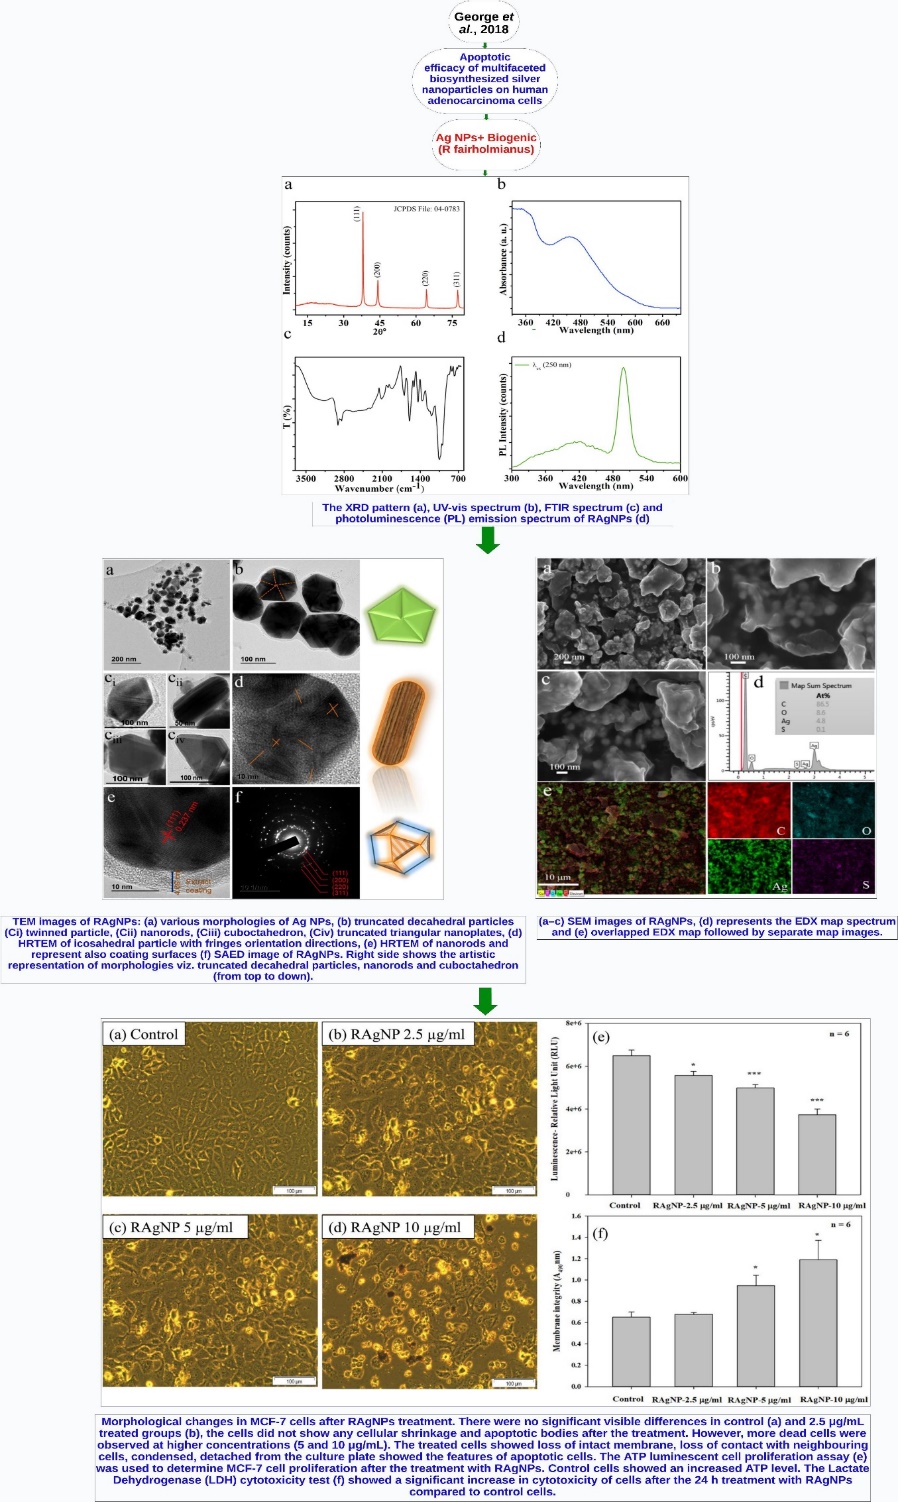


**a**


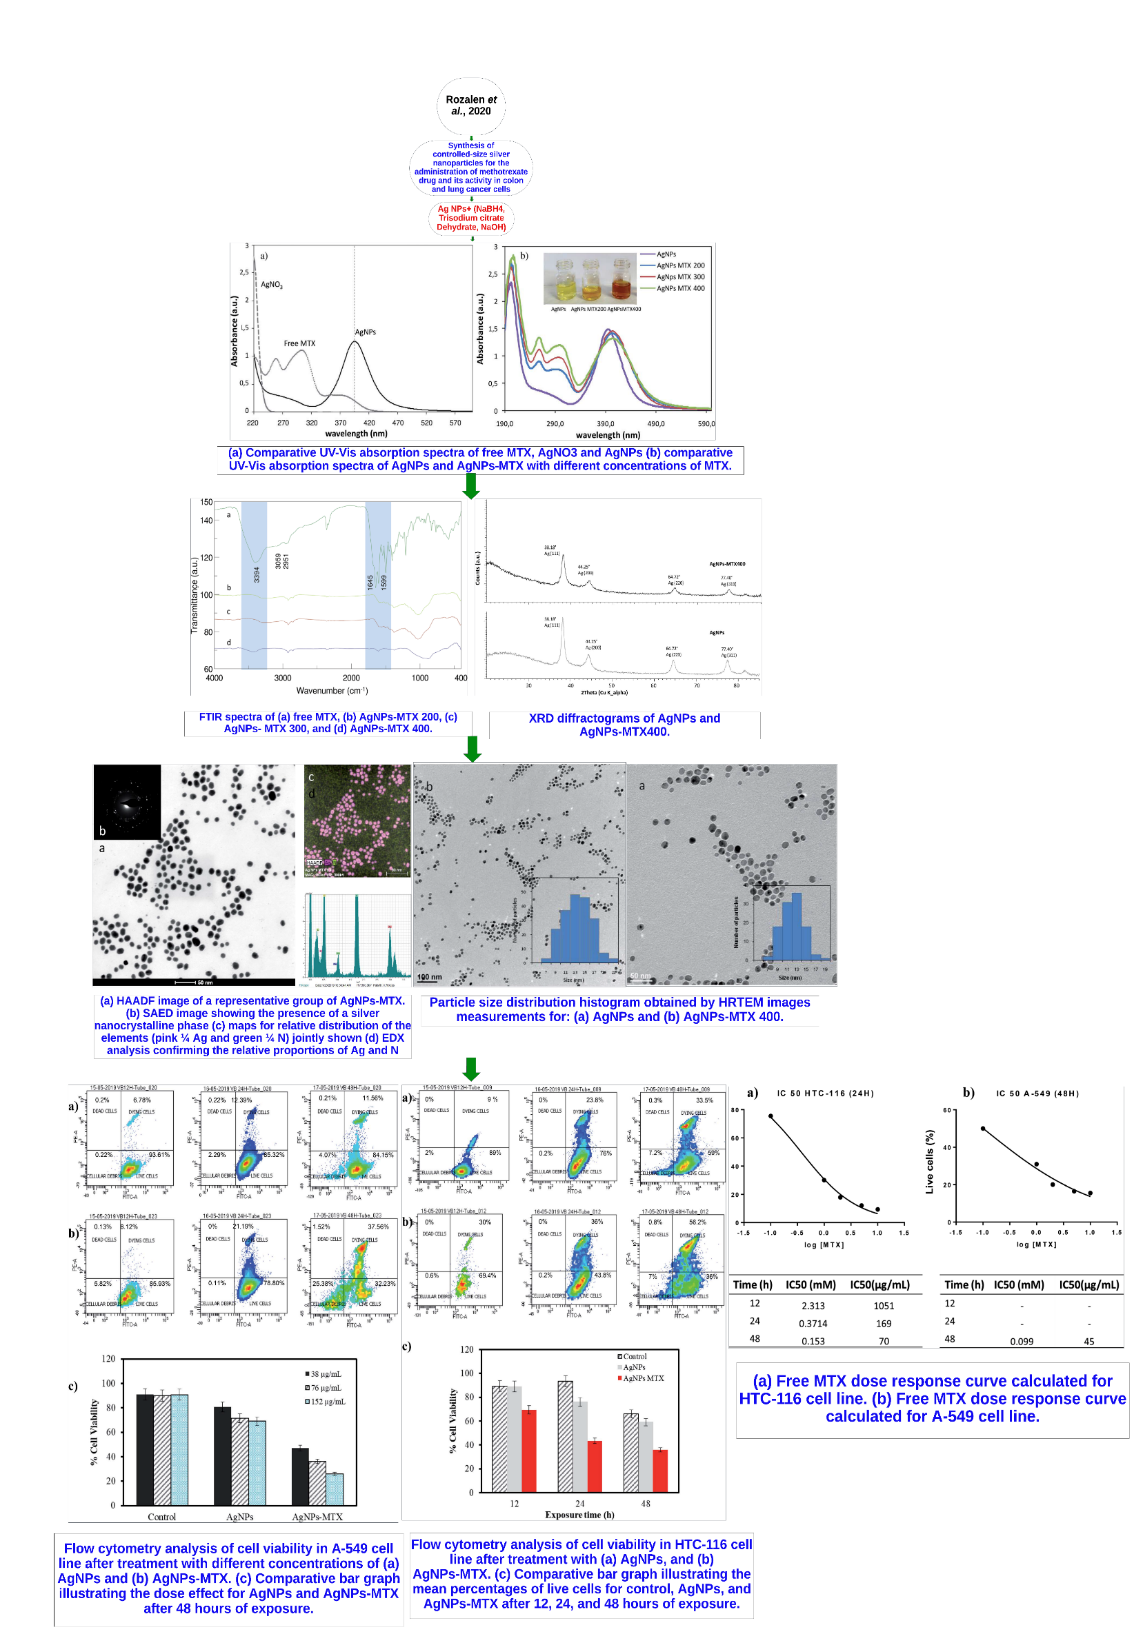


**b**

**Figure S5.** articles summary for a. George *et al.,* 2018 [18] and b. Rozalen *et al.,* 2020 [19]


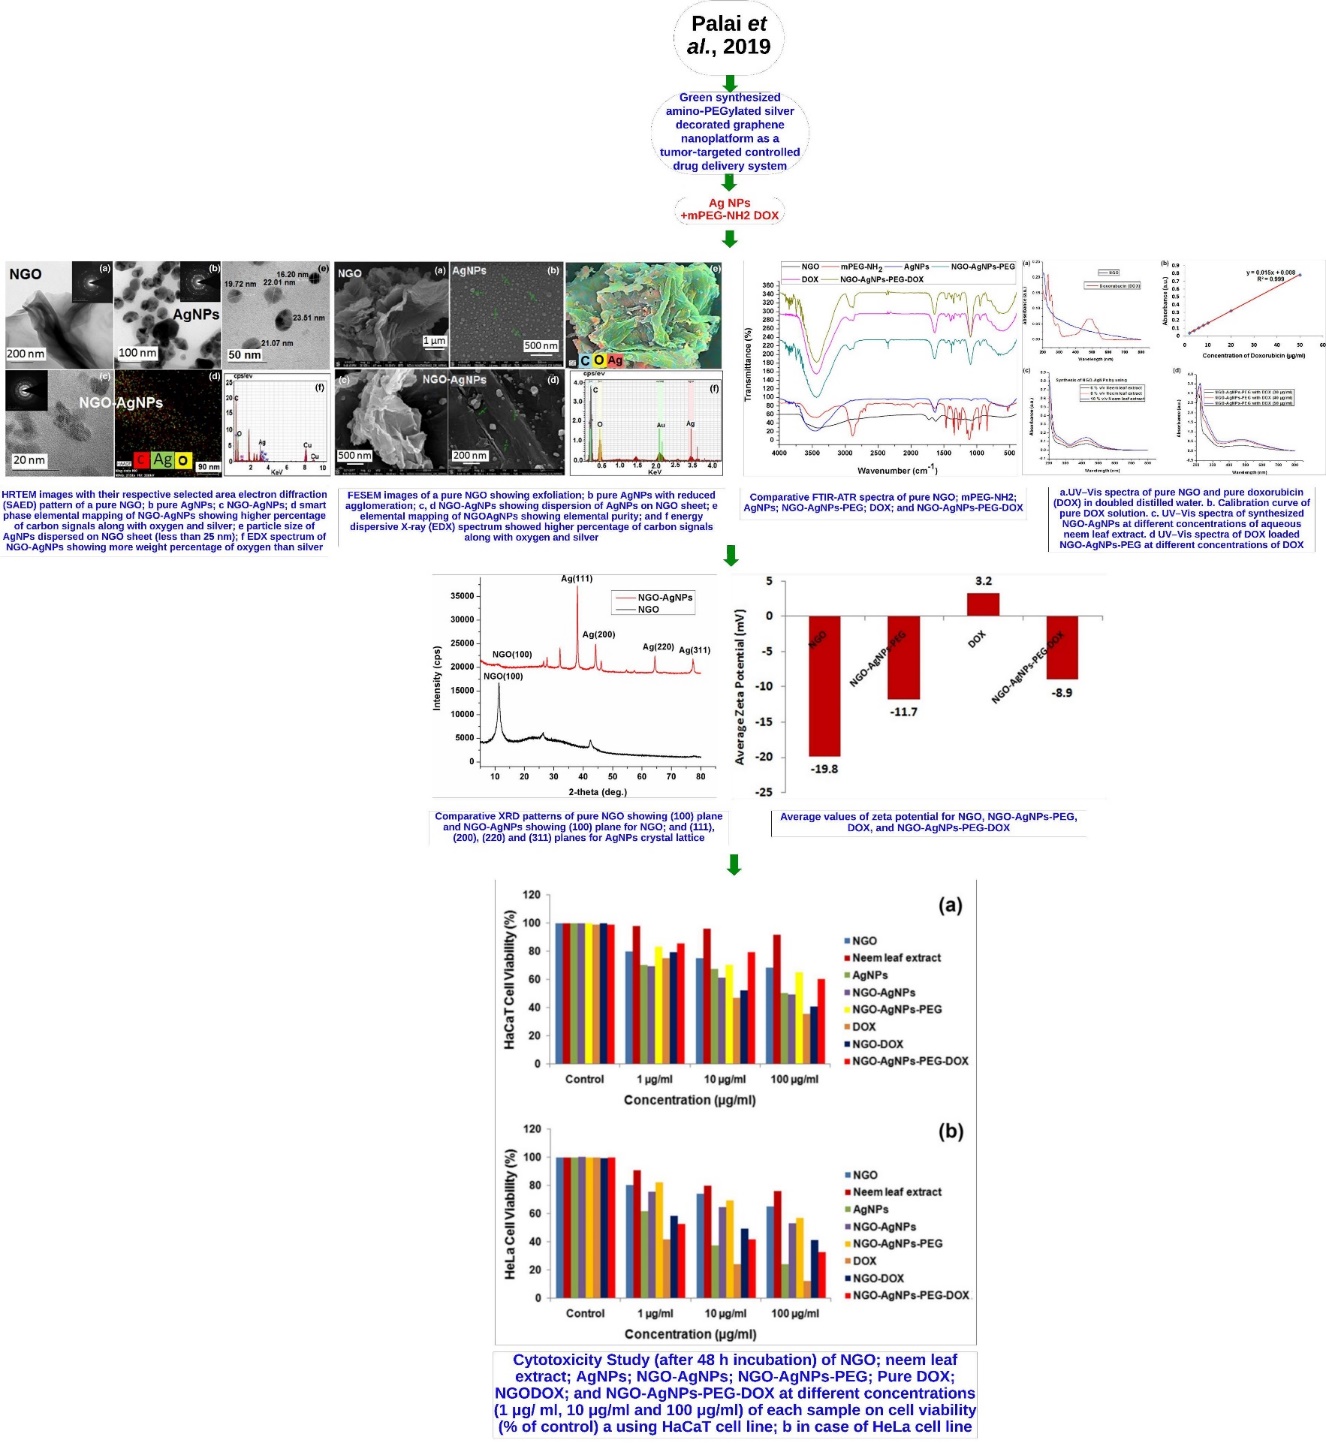


**a**


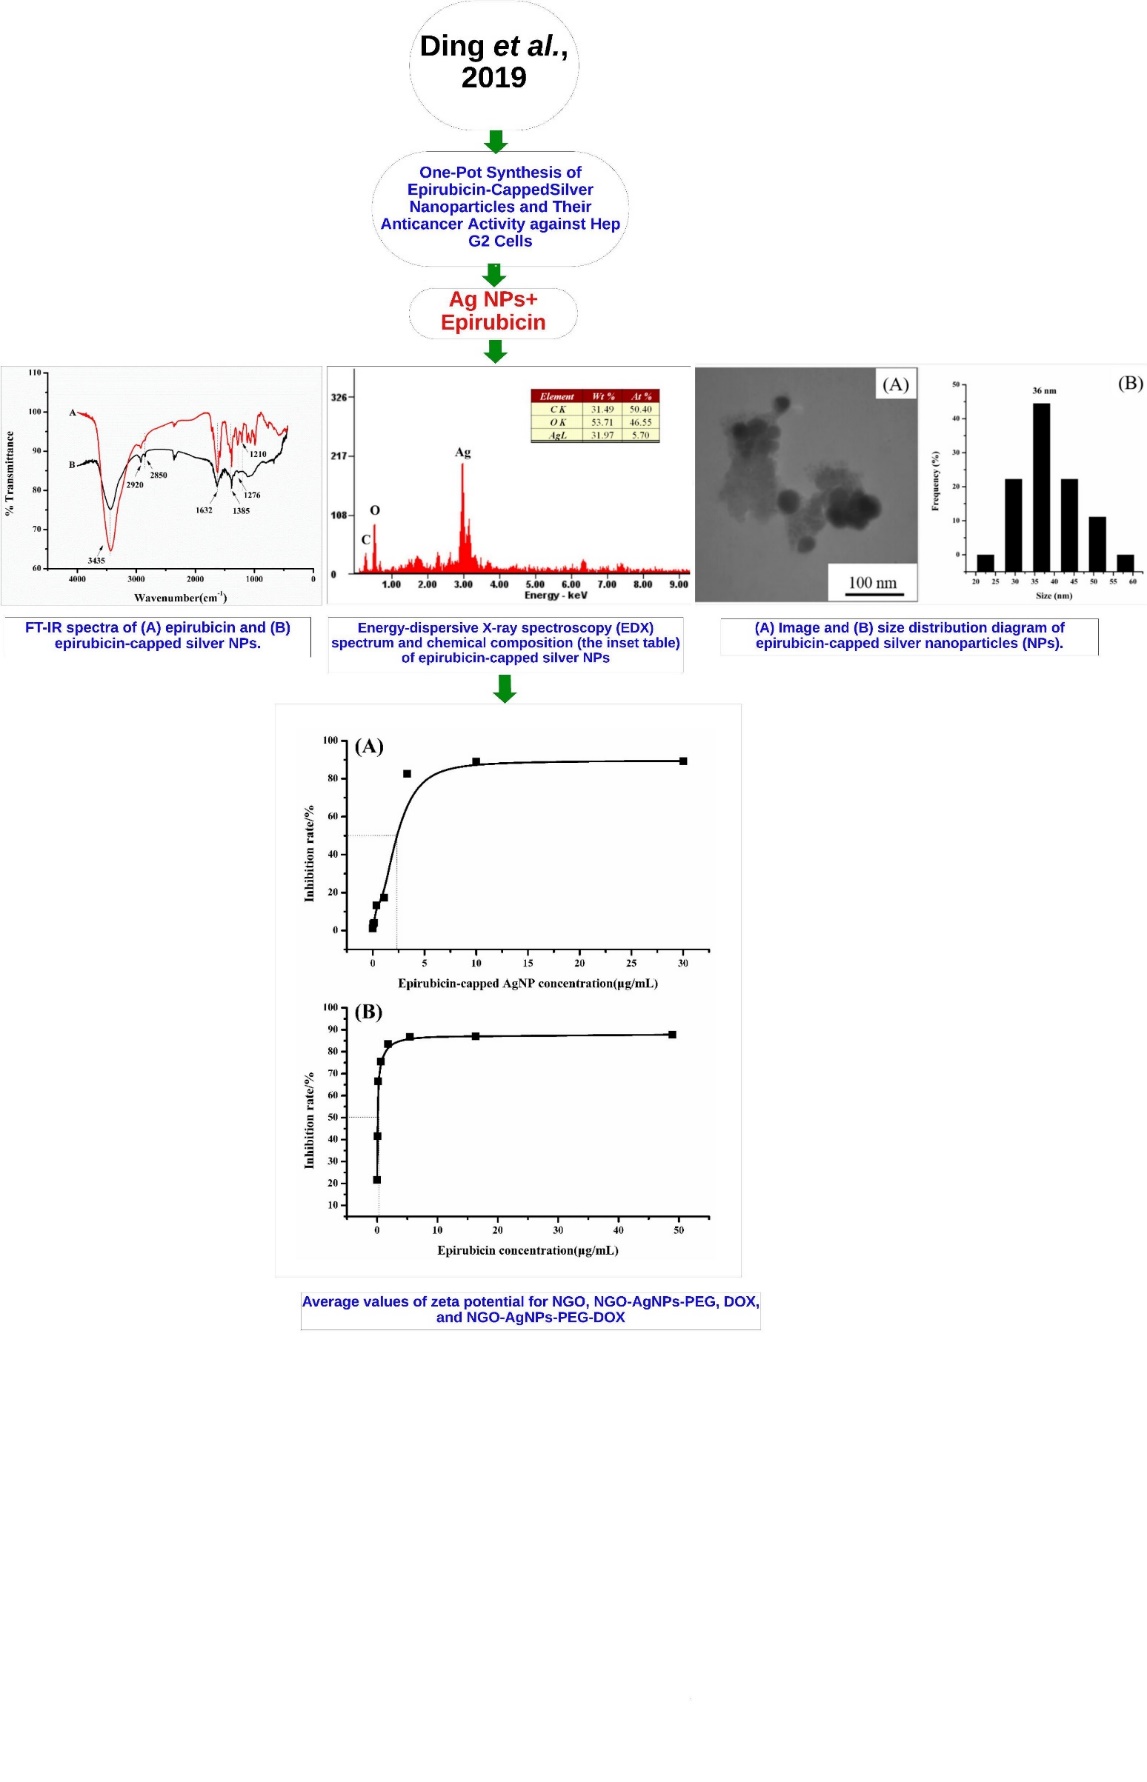


**b**

**Figure S6.** articles summary for a. Palai *et al.,* 2019 [20] and b. Ding *et al.,* 2019 [21]


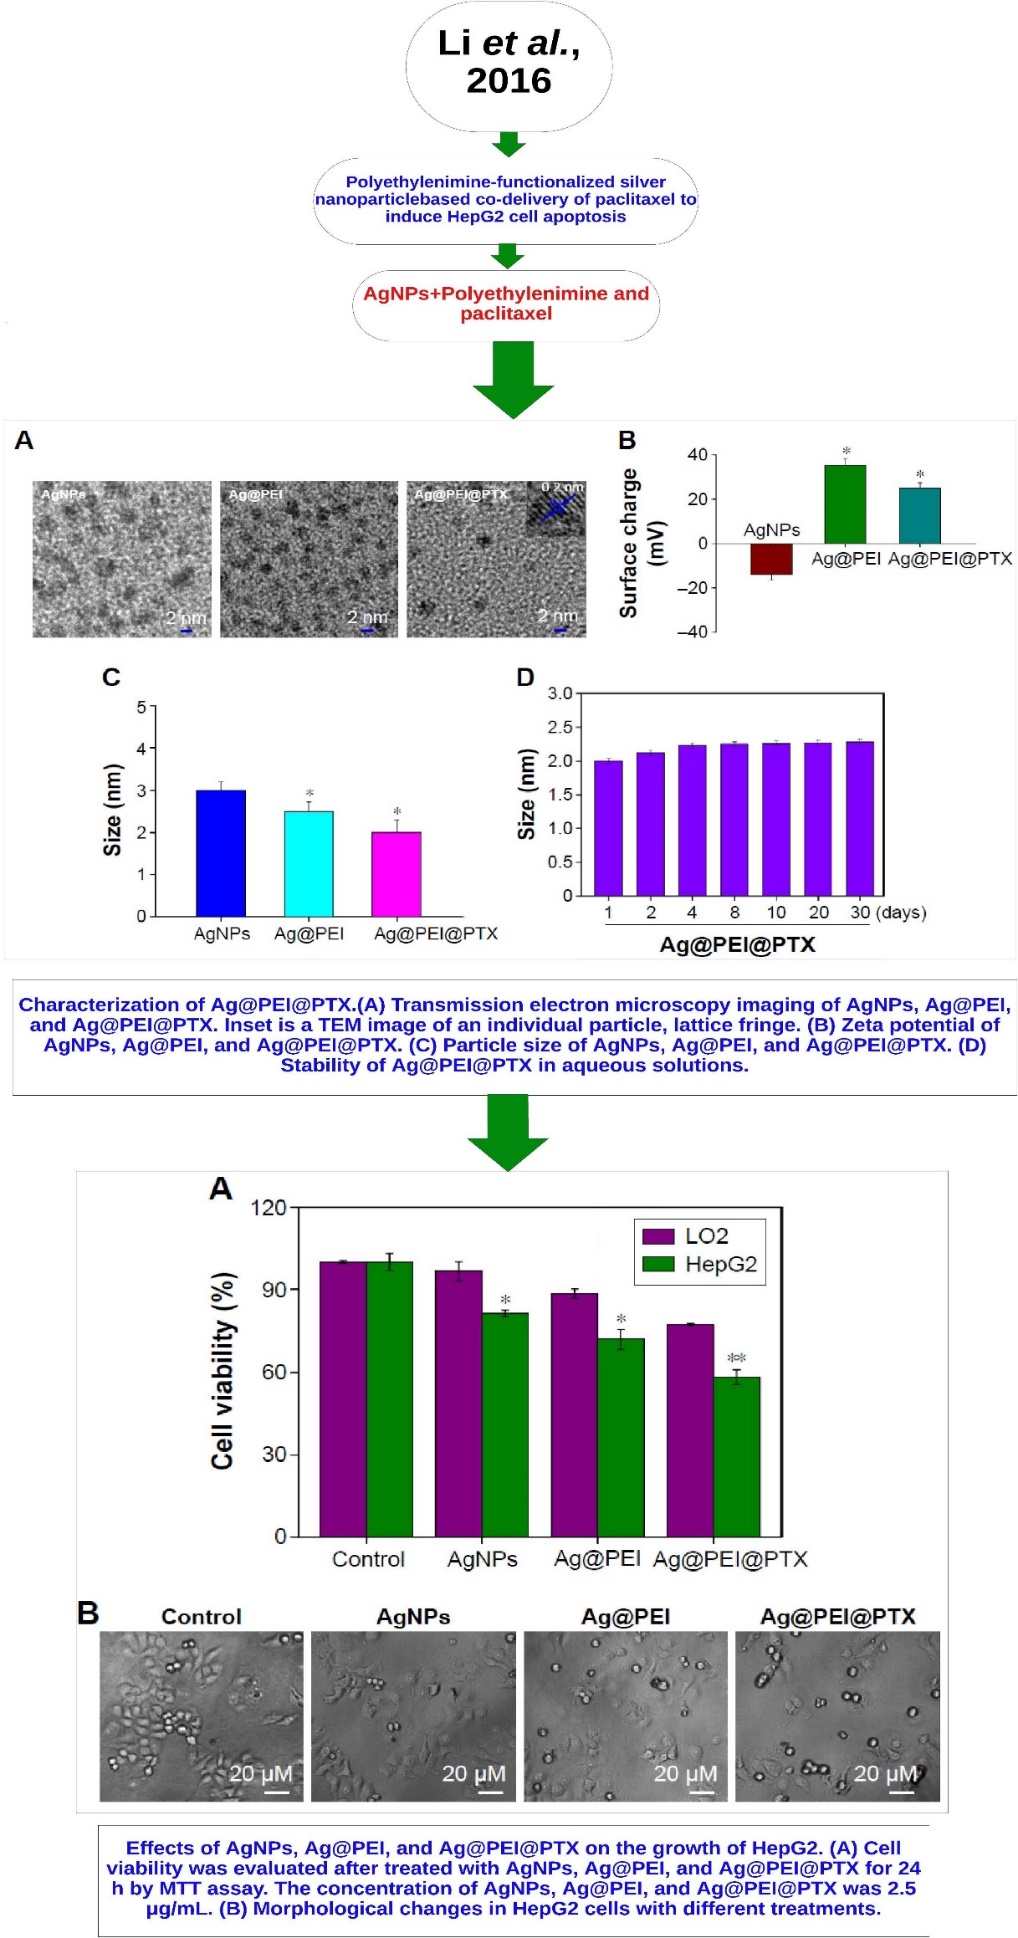


**a**


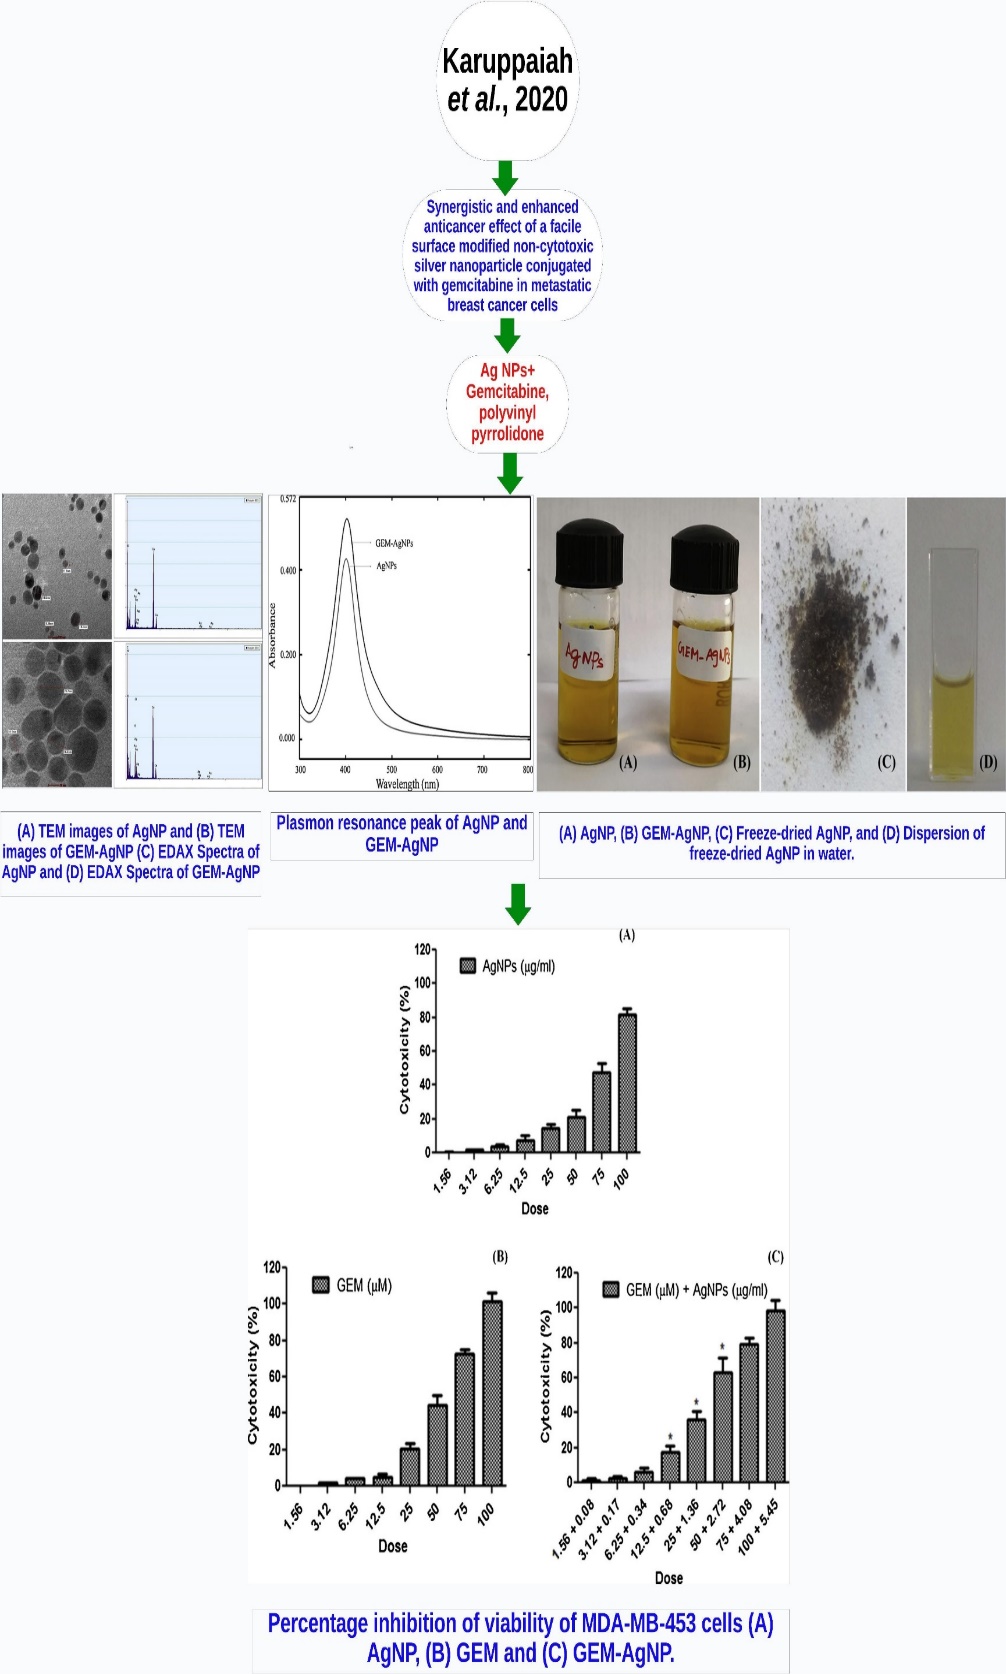


**b**


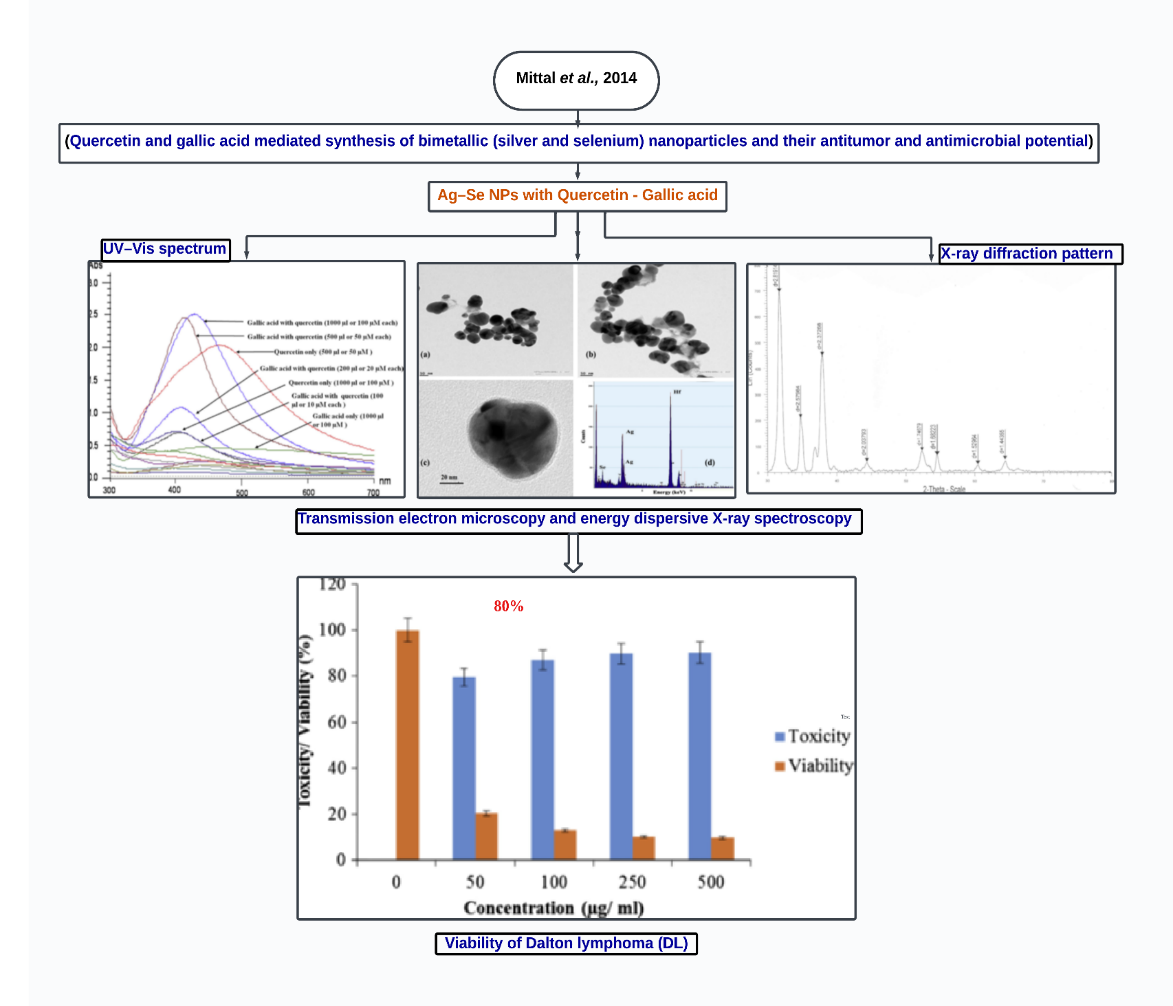


**c**

**Figure S7.** articles summary for a. Li *et al.*, 2016 [22], b. Karuppaiah *et al.* 2020 [23], and Mittal *et al.,* 2014 [24]


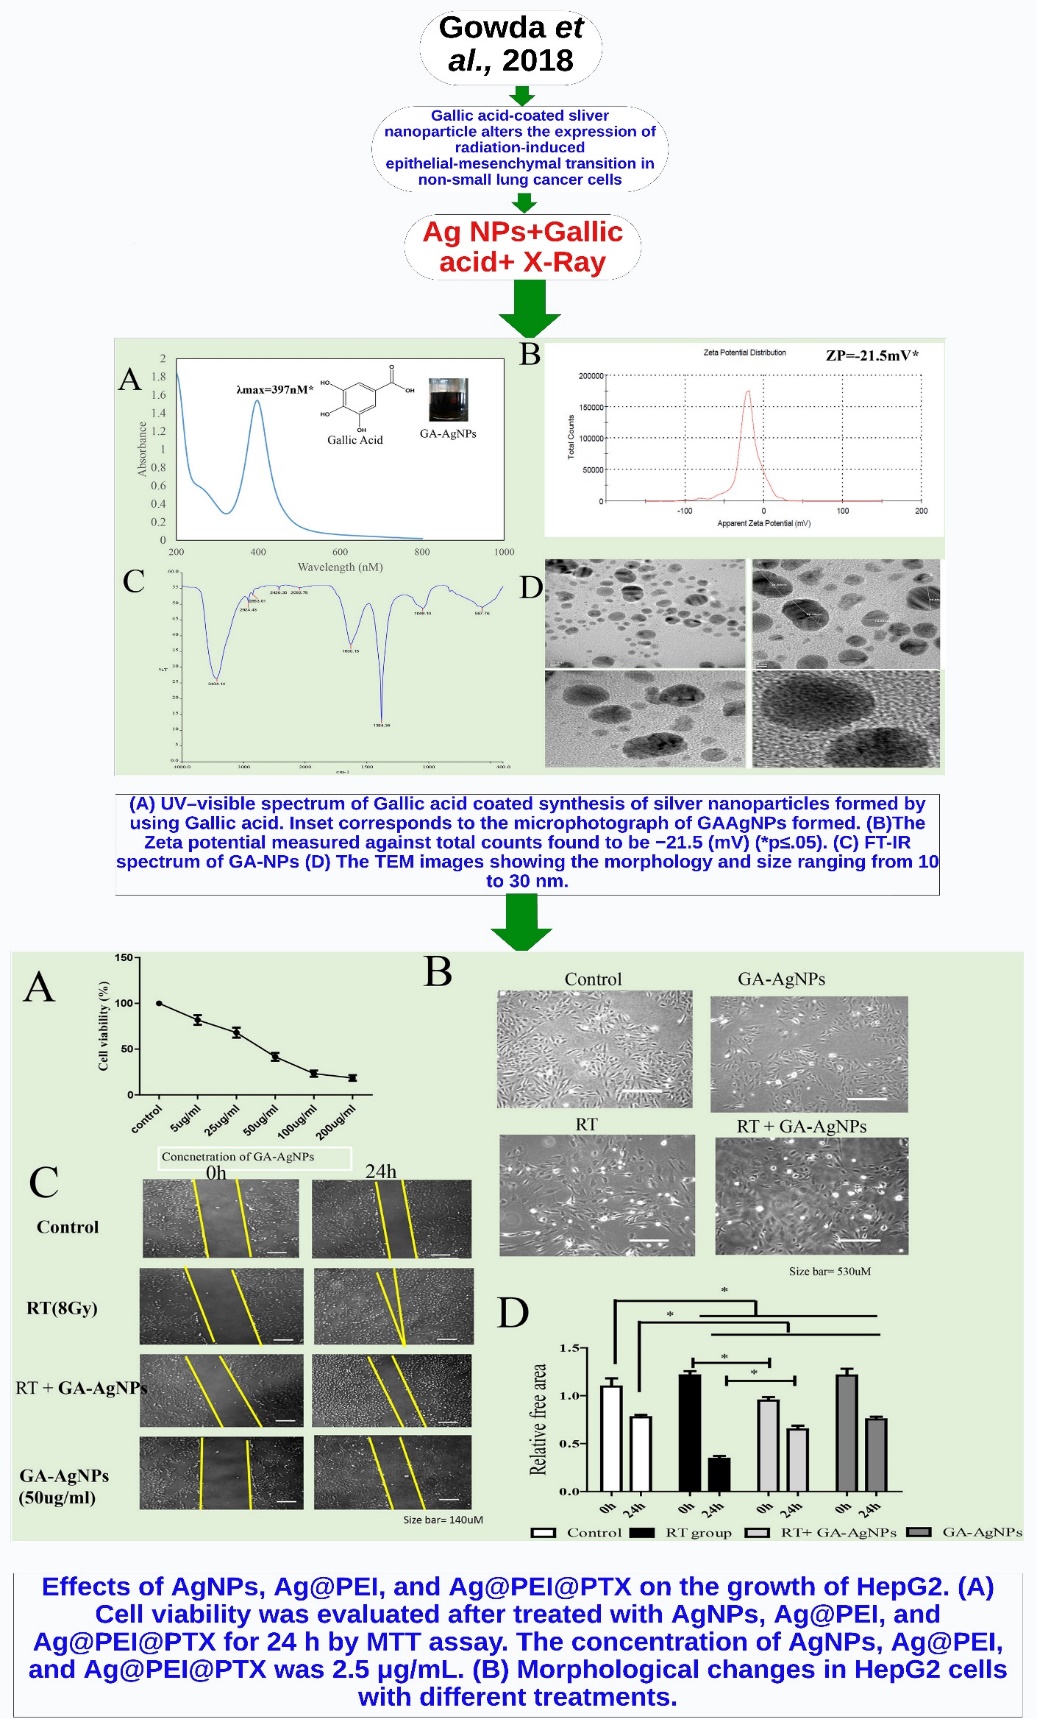


**a**


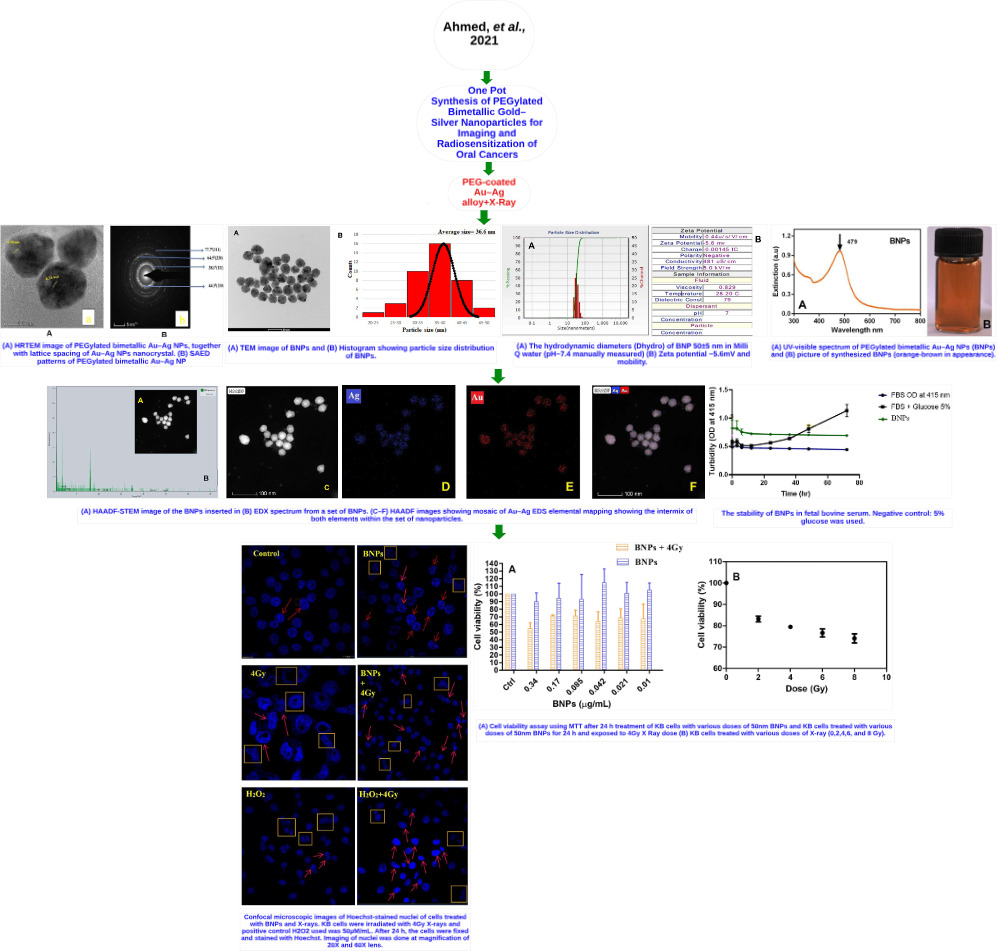


**b**

**Figure S8.** articles summary for a. Gowda *et al.,* 2018 [37], and b. Ahmed *et al.,* 2021 [38]


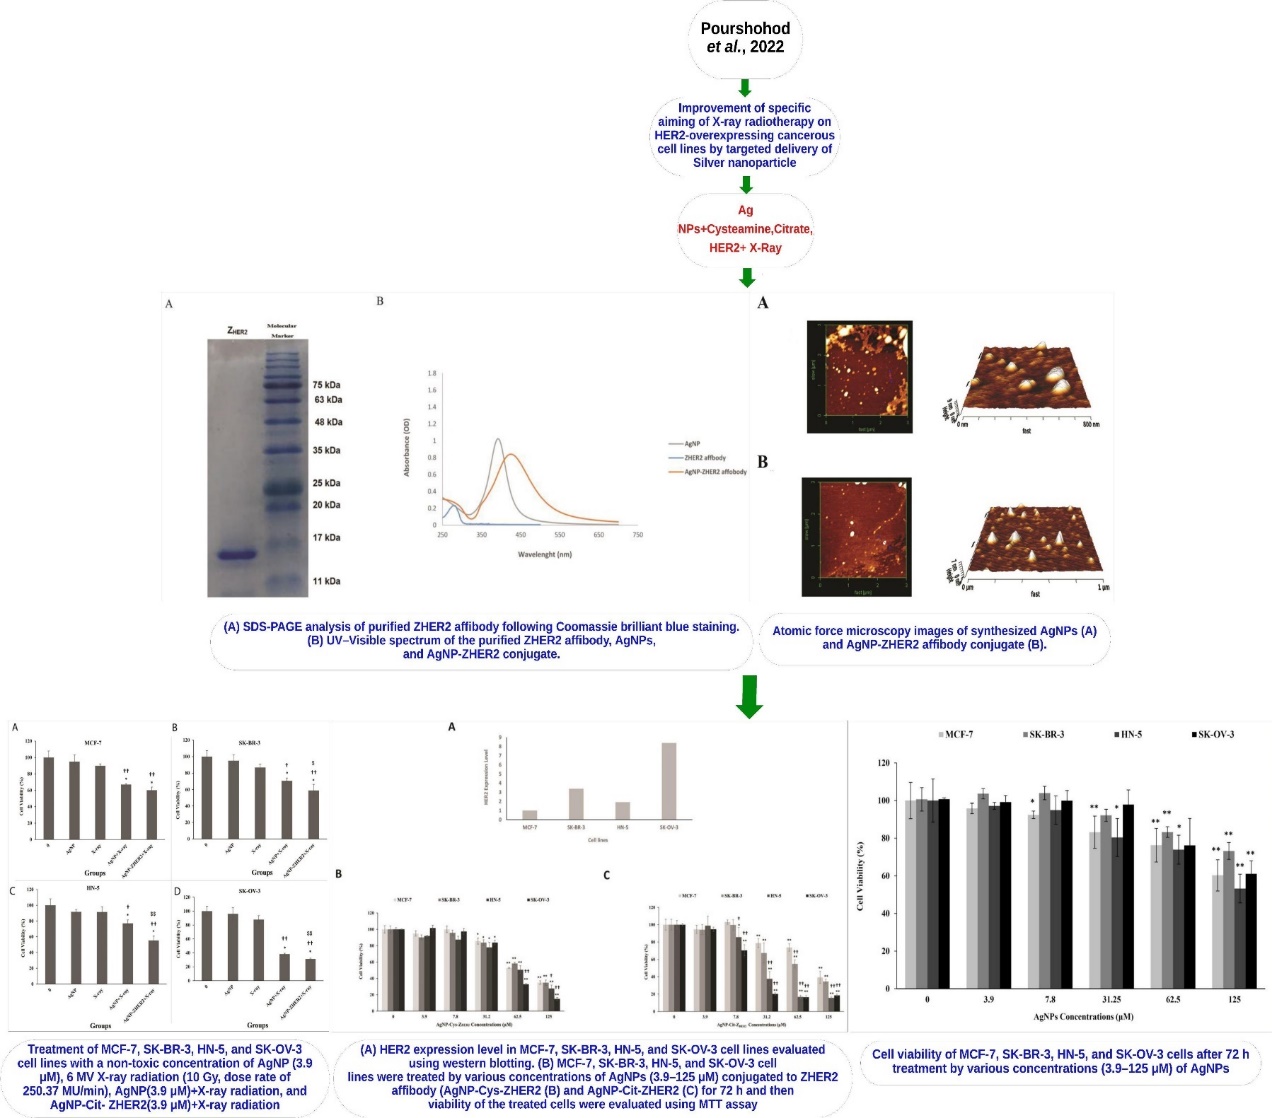


**a**


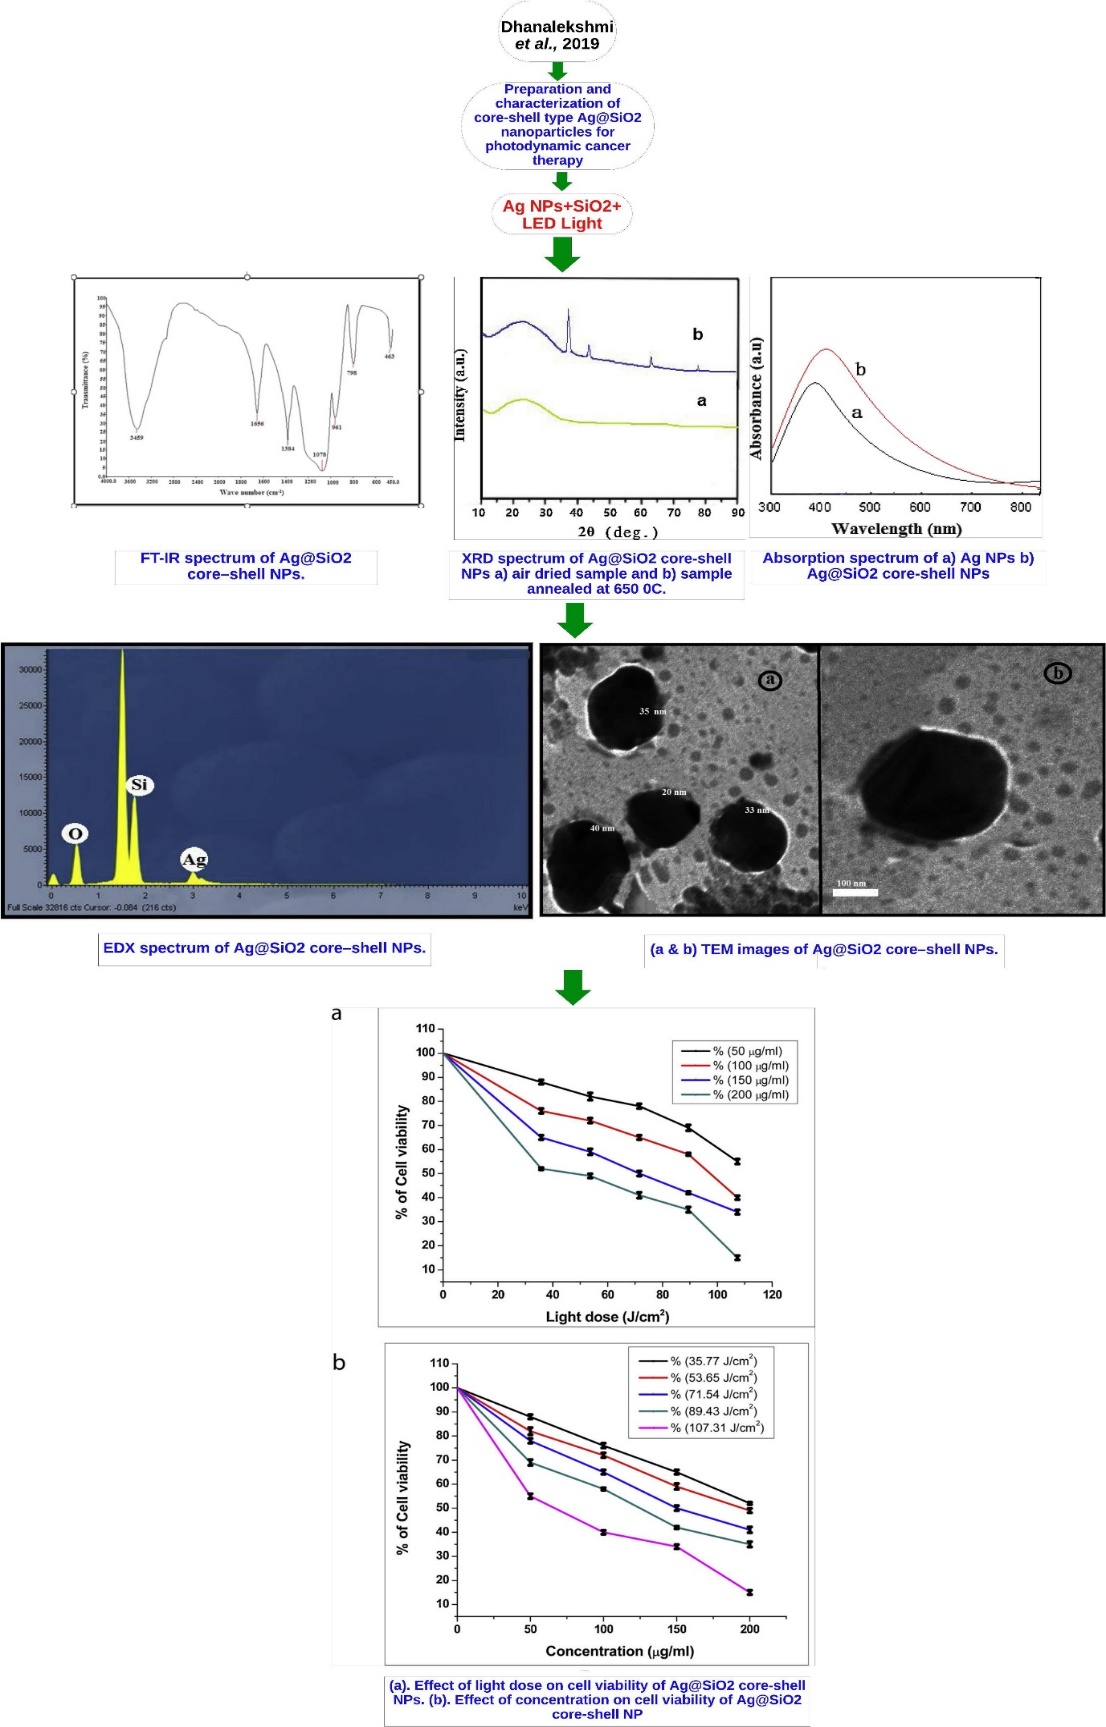


**b**

**Figure S9.** articles summary for a. Pourshohod *et al.*, 2022 [39], and b. Dhanalekshmi *et al.,* 2019 [40]


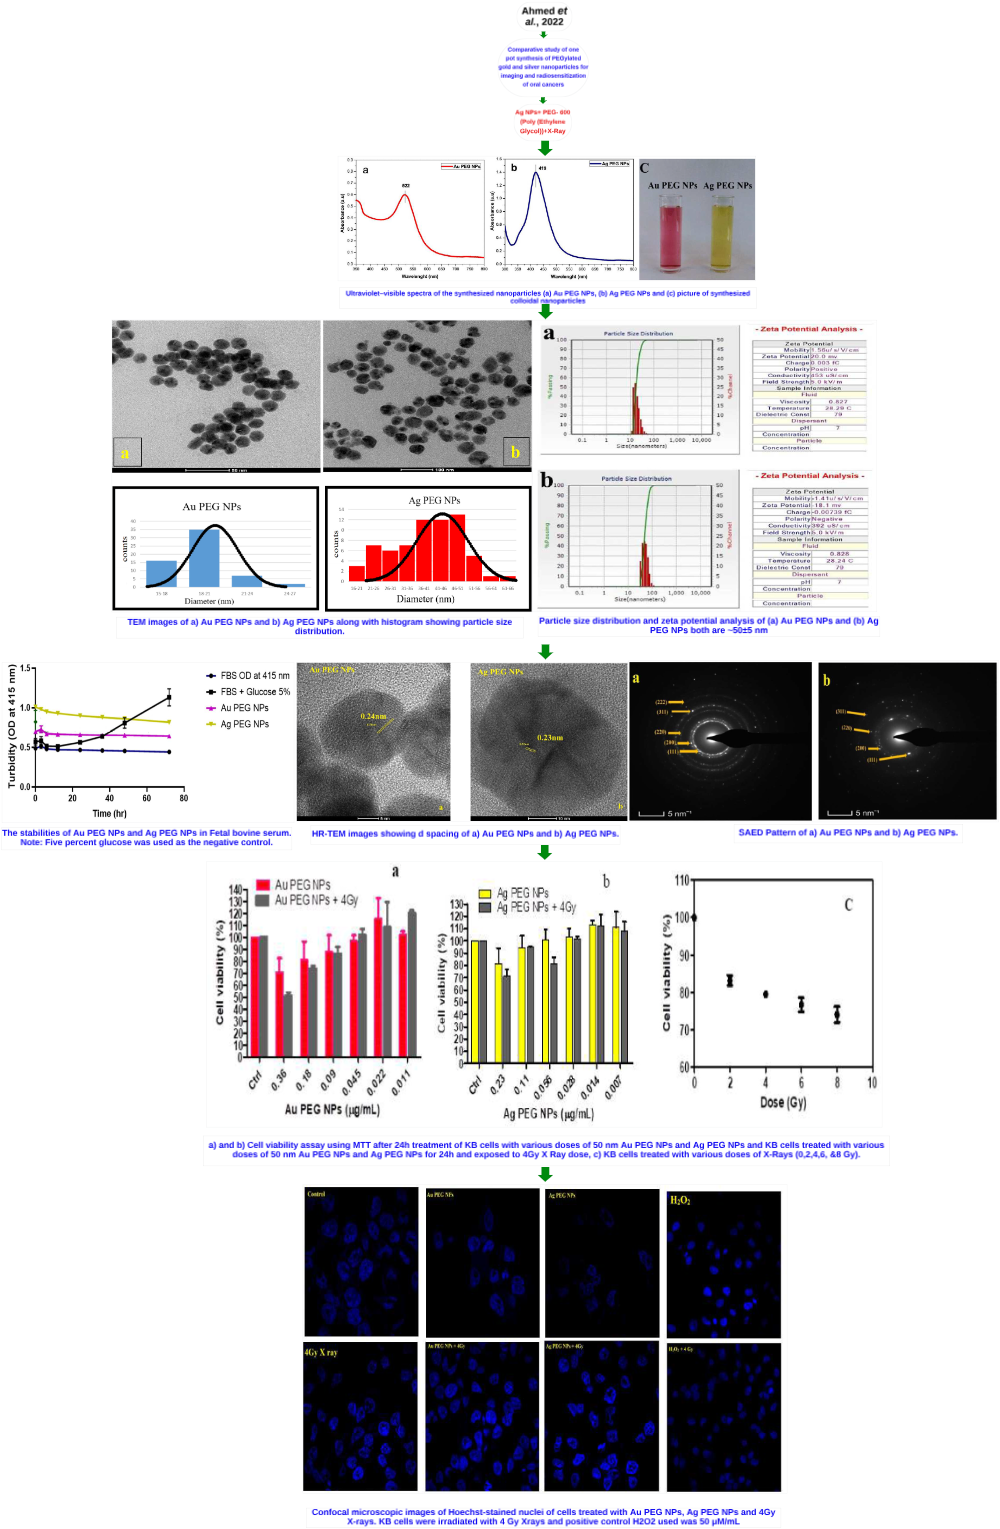
**Figure S10.** articles summary for Ahmed *et al.,* 2022 [41]
